# Supplementary material for: Essential role of multi-element data in interpreting elevated element concentrations in areas impacted by both natural and anthropogenic influences
Source: PeerJ journal article supplement (doi:10.7717/peerj.15904), 2023-09-18

Assessment of metal uptake in vegetables under different anthropogenic pressures

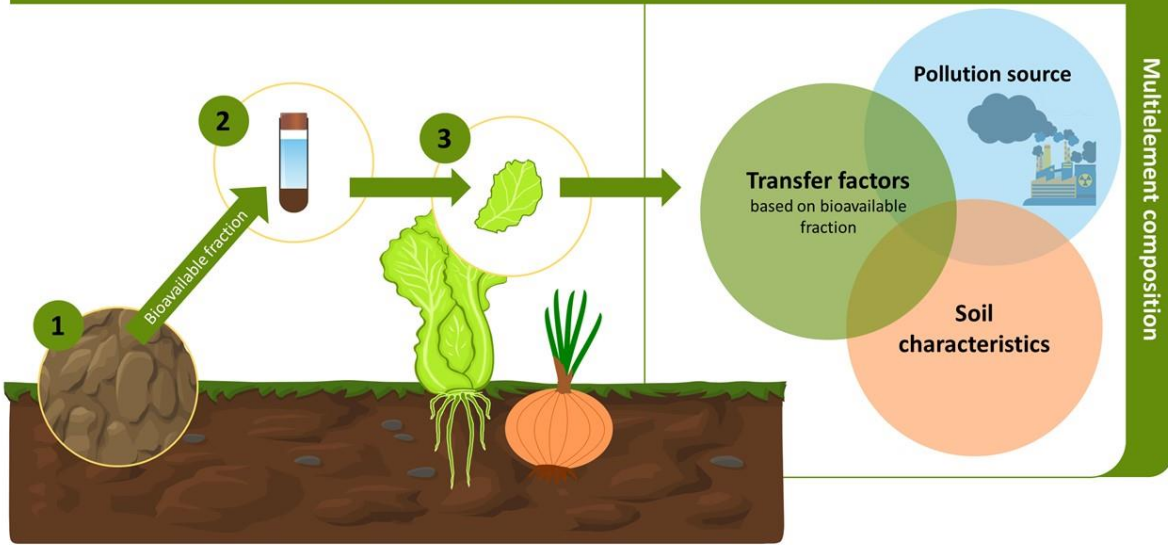

Supplement: Graphical_abstract_Petrovic_et_al..pdf [file Graphical_abstract_Petrovic_et_al..pdf]
