# Supplementary material for: Essential role of multi-element data in interpreting elevated element concentrations in areas impacted by both natural and anthropogenic influences
Source: PeerJ. 2023 Sep 18;11:e15904. doi: 10.7717/peerj.15904 (PMC10512964; doi:10.7717/peerj.15904)
Supplement: Supplemental Information 1 [file peerj-11-15904-s001.xlsx]

## Sheet: Article data
Essential role of multi-element data in interpreting elevated element concentrations in areas impacted by both natural and anthropogenic influences
Marija Petrović1, Gordana Medunić2, Željka Fiket1*
1 Divison for Marine and Environmental Research, Ruđer Bošković Institute, Bijenička cesta 54, HR-10000 Zagreb, Croatia
2 Department of Geology, Faculty of Science, University of Zagreb, Horvatovac 102a, HR-10000 Zagreb, Croatia
* Corresponding author:
E-mail address: zeljka.fiket@irb.hr
SUPPLEMENTARY MATERIAL

## Sheet: Soil data
Table S1. Concentration of metals and metalloids in soils (Zorić, 2020).
						Sampling site
Element	unit	K1	K2	K3	K4	K5	R1	R2	O1	O2	O3	O4	O5
pH		8.87	8.82	7.51	8.36	8.23	9.04	8.89	8.51	8.86	8.27	8.48	6.89
Al	g/kg	40.1107	35.5524	77.1776	20.0457	74.7024	40.5967	68.1099	51.3774	58.4977	79.0056	85.4972	94.0636
As	mg/kg	13.6273	9.64567	18.311	6.66994	23.1727	11.6628	20.7112	17.3878	21.1795	26.2491	24.8799	35.6861
Ba	mg/kg	276.799	1051.74	412.962	363.193	412.224	322.341	370.092	252.596	244.368	392.828	311.993	318.008
Ca	g/kg	163.861	181.823	40.0278	215.682	44.6281	154.07	91.6599	96.9063	85.1638	54.518	20.1205	10.4083
Cd	mg/kg	1.41697	1.12992	1.33996	4.13949	1.61184	0.965116	1.00786	1.307	0.858169	1.25458	1.1595	1.08647
Co	mg/kg	10.4151	10.9075	18.1157	5.87033	20.2303	18.5446	17.1415	20.0754	14.14	21.8498	19.9928	27.7481
Cr	mg/kg	91.1808	71.685	151.499	47.6051	160.995	110.702	133.847	100.842	110.567	149.288	149.439	172.083
Cu	mg/kg	60.4502	69.6909	49.9747	64.2809	85.3372	57.8508	51.167	65.8007	61.3483	84.7253	85.8996	64.3665
Fe	g/kg	26.8996	22.6826	43.4321	18.5382	48.5498	27.9808	38.07	31.1858	34.8492	46.8011	48.4235	55.2814
Li	mg/kg	32.31	27.1457	56.2007	14.6739	63.9128	33.593	50.1139	76.8582	95.088	130.848	88.3172	202.045
Mg	g/kg	8.7998	7.41362	8.65743	7.97161	7.91252	6.5795	7.36059	10.198	5.78901	6.49454	9.42925	8.1608
Mn	mg/kg	632.701	2338.98	1020.67	466.466	1190.29	1132.68	1067.47	1296.19	960.961	1128.95	1426.84	1372.18
Mo	mg/kg	17.7011	3.42717	3.92405	3.1611	9.00329	4.00581	9.80943	2.24955	1.97487	3.7619	5.23656	3.40414
Ni	mg/kg	71.4225	73.6791	107.499	60.4106	114.709	94.6337	109.532	91.0054	90.8761	109.527	119.018	136.962
P	g/kg	1.21878	4.4465	0.897805	1.91208	2.05359	1.94542	1.71028	1.78395	1.81687	1.98419	2.22913	1.8953
Pb	mg/kg	100.218	54.8504	37.7034	407.929	59.1135	98.9729	39.2849	73.7666	43.5476	80.3004	44.491	60.735
S	g/kg	4.99687	1.71255	1.01883	3.70111	2.47041	4.60634	1.85184	0.850697	0.588409	0.48119	0.501701	0.404915
Sb	mg/kg	1.82657	1.3878	1.24774	5.6169	2.13158	1.53488	2.02161	1.66427	1.7289	2.61905	2.01075	2.40789
Sc	mg/kg	7.06827	6.18504	14.2333	3.67976	13.8421	7.89147	12.1984	9.3842	10.2693	14.9689	15.8566	17.7538
Se	mg/kg	4.85609	1.85236	4.18987	3.94106	3.96711	6.29264	7.31434	4.63016	0.123878	1.94139	2.09498	1.70113
Sn	mg/kg	7.88561	5.03543	5.27486	9.67191	6.11513	7.78682	6.13556	6.59605	7.2298	7.19963	5.10573	6.71992
Sr	mg/kg	224.046	352.187	114.635	297.554	139.191	311.134	204.464	118.158	120.585	120.674	94.2312	84.7669
Ti	g/kg	2.39781	2.46643	4.88313	1.20265	4.5501	2.72852	4.0925	3.2078	3.28779	5.24023	5.16188	5.85034
Tl	mg/kg	0.612546	0.586614	1.22966	0.27112	1.25658	0.542636	0.913556	1.28366	1.39677	2.08425	2.25448	2.62406
U	mg/kg	4.22694	1.74803	3.51356	3.20629	4.39638	3.44574	5.19646	3.47038	3.46858	6.23077	5.83513	5.96053
V	mg/kg	117.572	84.1772	178.698	55.4244	192.98	111.407	164.902	130.878	158.571	223.645	197.127	226.806
Zn	mg/kg	279.354	797.089	143.989	570.198	221.676	208.864	217.167	441.959	192.443	330.963	232.645	247.799

## Sheet: Vegetable data
Table S2. Concentration of metals and metalloids in the vegetables (Zorić, 2020).
			Al	As	Ba	Ca	Cd	Co	Cr	Cu	Fe	Li	Mg	Mn	Mo	Ni	P	Pb	S	Sb	Sc	Se	Sn	Sr	Ti	Tl	U	V	Zn
Sampling site	Vegetable type	Part of the plant	mg/kg	mg/kg	mg/kg	mg/kg	mg/kg	mg/kg	mg/kg	mg/kg	mg/kg	mg/kg	mg/kg	mg/kg	mg/kg	mg/kg	mg/kg	mg/kg	mg/kg	mg/kg	mg/kg	mg/kg	mg/kg	mg/kg	mg/kg	mg/kg	mg/kg	mg/kg	mg/kg
K1	parsley	root	1483	0.51	74.4	4470	0.18	0.35	2.8	15	736	1.01	2162	28.6	1.01	3.13	2083	4.55	1214	0.06	0.27	0.95	0.29	26.9	62	0.04	0.11	3.74	44.4
	parsley	stem	197	0.14	125	13049	0.18	0.12	0.4	7.33	132	0.19	1141	14.2	0.54	1.69	5586	0.75	1455	0.02	0.03	1.18	0.12	45	5.43	0.01	0.02	0.48	28.5
	parsley	leaf	510	0.27	33.3	8837	0.14	0.24	1.41	18.1	355	0.48	2000	40.3	1.94	4.02	6194	1.3	3329	0.04	0.09	1.59	0.19	14.2	33.8	0.01	0.03	1.39	77.6
	onion	root	3828	2.34	53.3	11213	1.5	1.66	13.8	140	3369	5.38	1764	86.5	8.8	8.68	10331	15.5	6980	0.35	1.05	2.01	1.27	40.4	254	0.13	0.6	32.7	172
	onion	bulb	135	0.12	11.1	7255	0.31	0.06	0.47	1.67	163	0.21	1221	8.48	4.24	0.56	1821	0.51	1702	0.07	0.03	0.87	0.11	19.5	8.5	0.01	0.06	0.61	31.2
	onion	leaf	460	0.21	7.36	9881	0.36	0.22	1.09	8.07	947	0.41	2230	35.4	6.05	2.14	4274	1.06	7499	0.05	0.08	5.51	0.16	9.77	28	0.01	0.04	1.23	101
K2	fennel	root	2160	1.73	124	23090	0.78	0.65	4.12	23.8	1032	1.67	3181	175	0.32	6.93	3471	5.65	1085	0.29	0.38	0.58	0.32	112	124	0.05	0.16	4.82	243
	fennel	leaf	428	0.19	16.2	12906	0.25	0.17	1.11	21.9	293	2.55	2285	63.3	0.74	3.4	6112	1.18	4265	0.03	0.08	0.59	0.16	30.5	33.5	0.01	0.05	1.13	94.9
K3	onion	root	4156	1.56	42.8	7509	2.07	2.34	12.1	27	3297	5	1860	119	6.02	8.43	5527	4.04	9429	0.12	1.04	0.52	0.57	49.4	265	0.14	0.3	15.6	117
	onion	bulb	66.5	0.05	2.3	3984	0.5	0.09	0.94	7.84	59.1	0.24	893	11.1	0.67	1.38	3914	0.56	6946	0.02	0.01	0.38	0.22	13.6	4.03	0.02	<0.002	0.12	46.5
	onion	leaf	870	0.29	5.5	2225	0.2	0.26	2	14	534	0.69	1852	45.2	0.89	3.21	4631	0.68	7365	0.03	0.17	0.49	0.19	4.09	51.5	0.02	0.04	2.09	32.7
K5	lettuce	root	11164	3.18	67.7	9428	0.63	2.83	21.5	31	6221	10.1	2403	159	2.24	13.1	3559	8.27	3579	0.47	2.3	0.67	0.82	56.5	459	0.21	0.71	29.9	78.8
	lettuce	leaf	1169	0.5	12.8	12817	0.57	0.42	2.71	13.5	768	1.02	1959	55.7	3.25	5	5902	1.11	4665	0.04	0.22	0.48	0.22	24.2	67.1	0.02	0.07	2.92	55.8
	garlic	root	6783	2.62	34.2	8523	0.67	1.53	12.5	12.7	3136	5.49	4971	91	4.72	7.56	3455	5	12387	0.15	1.26	1.28	0.47	32.7	267	0.11	0.44	26.2	67.4
	garlic	bulb	48.8	0.09	3.48	2657	0.25	0.05	0.1	1.82	43.6	0.27	1185	6.86	5.85	0.34	2789	0.11	5022	0.01	0.01	1.85	0.09	6.68	2.72	<0.002	<0.002	0.16	29.1
	garlic	leaf	701	0.29	5.96	3632	0.14	0.22	1.57	7.71	448	0.6	2116	31.6	2.66	2.82	4336	0.85	8753	0.03	0.13	3.67	0.17	4.11	36.9	0.01	0.04	1.83	69.3
R1	lettuce	root	2610	1.13	28.3	6201	0.47	0.78	5.07	21.1	1384	4.58	1749	65.3	0.44	4.71	1414	2.3	1261	0.12	0.47	<0.002	0.3	27.4	119	0.07	0.22	7.92	81.3
	lettuce	leaf	377	0.16	7.97	10208	0.22	0.27	1.02	11.9	300	0.34	2774	52.5	1.37	3.54	5204	0.54	3345	0.01	0.07	1.11	0.14	21	25.8	0.01	0.03	1.01	61.8
	lettuce	root	8117	2.17	69.2	23158	0.59	3.3	19.9	20.1	4824	7.75	2485	185	2.87	14.5	3686	10.7	3626	0.38	1.76	1.68	1.03	75.4	384	0.2	0.98	28.6	84
	lettuce	leaf	822	0.4	14.1	10050	0.27	0.46	2.38	10.3	569	0.68	1483	45.7	0.96	5.67	4911	1.33	2217	0.04	0.16	0.83	0.22	25.7	46.8	0.02	0.07	2.2	55.6
	garlic	root	5085	1.34	33.4	9272	0.43	1.48	10.2	14.6	2521	3.97	3940	76.9	4.49	8.22	3701	4.96	8506	0.15	1.04	4.31	0.54	35.3	202	0.08	0.35	18.3	66.3
	garlic	bulb	47.2	0.05	4.04	2791	0.47	0.04	0.15	7.25	49.2	0.21	1451	7.9	6.14	0.48	4566	0.22	9489	0.01	0.01	6.7	0.15	8.25	2.6	<0.002	0.01	0.19	61.6
	garlic	leaf	639	0.3	5.82	3892	0.14	0.26	1.85	10.4	443	0.54	2249	33	2.01	3.38	6035	0.8	14064	0.03	0.13	14.3	0.2	5.42	39.5	0.01	0.04	1.64	75.2
R2	lettuce	root	7006	2.66	56.7	9748	0.54	1.98	15.2	16.7	4101	6.75	2109	122	3.02	9.68	7013	5.08	1542	0.53	1.28	1.67	1.69	48.4	358	0.14	0.86	23.1	82.5
	lettuce	leaf	824	0.64	11.8	7607	0.38	0.4	1.94	20.1	534	0.66	2396	48.4	0.79	9.77	9114	0.82	3441	0.04	0.16	2.37	0.19	16.3	51	0.01	0.07	2.15	84.8
	radicchio	root	1114	0.42	17	4920	0.32	0.45	3.73	9.31	633	0.64	1946	33	0.99	2.93	3250	1.34	2030	0.13	0.21	1.69	0.35	33	56.8	0.03	0.27	5.66	73.4
	radicchio	leaf	752	0.37	11.5	7891	0.19	0.34	1.61	15.4	448	0.63	2623	45.2	1.13	6.18	5926	0.86	4076	0.03	0.15	2.77	0.23	19.3	71.2	0.02	0.08	1.97	75.5
O1	parsley	root	3428	1.64	77.3	7300	0.39	0.97	7.69	17	2390	8.72	3703	89.1	1.5	5.97	2177	3.72	2233	0.12	0.91	<0.002	0.36	30.6	202	0.13	0.29	12.6	50.9
	parsley	stem	609	0.36	115	22817	0.2	0.2	1.18	5.28	351	0.91	2497	25.7	0.45	3.34	1578	0.73	1312	0.03	0.12	0.11	0.13	46.2	32.2	0.02	0.04	1.62	34.7
	parsley	leaf	1119	0.55	33.8	14481	0.14	0.3	2.22	11.7	654	1.84	3185	58.4	1.39	3.34	3737	0.98	3395	0.04	0.19	0.16	0.2	16	55.7	0.03	0.07	2.9	61.5
O2	radicchio	root	2533	1.11	30.7	6305	0.5	0.81	5.26	23.6	1456	5.1	1212	69	0.48	5	1390	2.58	1250	0.12	0.62	0.04	0.33	29.9	131	0.08	0.25	8.49	74.9
	radicchio	leaf	941	0.49	16.6	16726	0.65	0.32	1.66	15.5	560	1.53	2949	80.3	0.93	2.75	4713	0.93	4066	0.03	0.17	0.12	0.16	27.7	19.9	0.03	0.05	2.41	68.2
	fennel	root	3709	1.25	53.3	16278	0.51	1.51	8.59	22.5	2365	5.7	4797	103	0.55	10.6	3383	5.65	1631	0.17	0.74	0.68	0.54	70	218	0.12	0.29	11	106
	fennel	leaf	441	0.26	6.99	19656	0.07	0.14	1.03	14.3	229	0.61	3132	63.7	0.82	1.27	3530	0.89	4675	0.04	0.08	0.21	0.16	18.9	25.5	0.02	0.03	1.07	61.5
O3	lettuce	root	16394	6.96	114	12594	0.65	5.6	34.1	41.8	10808	39.5	2932	260	2.93	22.3	3554	22.1	4990	0.71	3.64	0.45	3.12	448	801	0.63	1.59	64.1	145
	lettuce	leaf	984	0.4	13.1	6344	0.52	0.36	3.01	17.5	644	1.75	1927	43.2	1.07	4.5	7903	1.37	4234	0.05	0.2	0.35	0.19	7.78	66.7	0.03	0.09	2.83	81.4
	onion	root	6241	4.54	53.3	9128	1.16	2.37	16.4	28.4	4233	14.9	1685	96.2	3.56	12.1	5372	8.39	4366	0.25	1.38	0.15	0.81	33.2	366	0.22	0.71	49.3	144
	onion	bulb	345	0.19	25.9	11337	0.14	0.21	0.73	8.91	198	0.62	1709	25.1	2.37	1.33	4854	0.75	4565	0.03	0.06	<0.002	0.24	35.7	19	0.02	0.04	1.11	38.8
	onion	leaf	812	0.46	30.5	24374	0.14	0.35	1.88	7.38	505	1.39	1397	35.7	5.16	2.83	5309	1.05	5268	0.03	0.15	0.2	0.21	43	46.7	0.03	0.07	2.56	34.7
O4	lettuce	root	19953	6.2	47.9	15363	0.62	5.65	35.9	34.9	10891	24.7	4114	368	2.48	24.6	2060	11.5	2689	0.48	3.82	0.35	1.08	52.2	907	0.61	1.54	52.7	106
	lettuce	leaf	1373	0.54	9.8	7425	0.13	0.44	2.66	13	791	1.49	2692	43.4	0.82	4.4	5778	0.97	2787	0.04	0.26	0.11	0.17	13	77.3	0.04	0.11	3.24	48.4
	parsley	root	3422	1.22	87.8	5287	0.32	0.94	7.24	11.8	2154	5	2413	65.3	1.55	8.13	2729	2.23	1396	0.09	0.77	0.23	0.36	30	199	0.12	0.29	10.4	69
	parsley	stem	1008	0.83	89.6	17081	0.25	0.61	1.69	12.9	588	0.83	1437	38.3	0.64	26.7	2465	2.04	1287	0.04	0.19	0.27	0.17	46.4	28.5	0.02	0.08	2.37	71.5
	parsley	leaf	1009	0.35	18.1	11818	0.12	0.24	2.08	7.2	633	1.15	1993	57.1	3.7	1.68	4817	0.61	3211	0.03	0.19	0.1	0.17	15.1	56.2	0.03	0.07	2.42	31.6
O5	lettuce	root	6899	3.79	58.9	6858	0.94	3.58	22.1	16.7	6152	28	1089	178	1.67	17.2	4007	9.46	1431	0.35	2.07	0.31	0.85	30.6	516	0.48	0.86	28.2	91.1
	lettuce	leaf	920	0.49	12.1	12286	0.44	0.34	2.06	9.86	610	2.09	2471	41.8	0.8	2.19	7889	0.89	3369	0.04	0.17	0.17	0.17	17.1	55.5	0.04	0.07	2.3	50.4
	radicchio	root	6569	2.89	36.8	5478	0.41	2.38	13	12.6	3828	18	1987	105	1.49	8.96	3634	5.11	1391	0.29	1.52	0.23	0.55	23.5	318	0.28	0.49	19.3	45.7
	radicchio	leaf	2149	0.87	20.1	18944	0.49	0.65	3.99	7.82	1241	5.18	2029	80.3	4.36	3.67	3065	1.57	2815	0.07	0.39	0.17	0.22	26.6	116	0.08	0.15	5.28	37.9

## Sheet: Instrumental parameters
Table S3. Instrumental conditions of used mass spectrometers and data aquisition parameters for determination of selected elements.
HR ICP-MS	Element 2, Thermo, Germany
RF power	1200 W
Plasma gas flow rate	15.5 L min -1
Auxiliary gas flow rate	0.85 L min -1
Sample gas flow rate	1.063 L min -1
Torch	Fassel type, 1.5 mm i.d.
Nebulizer	Micro Mist, AR40-1-F02, 0,2 ml min -1 (Glass Expansion)
Sample cone	Ni
Skimmer cone	Ni
Acquisition mode	E-scan
No. Scans	20
Resolution	low (LR) = 300
	medium (MR) = 4000
	high (HR) = 10000
Calibration	External
ICP-QQQ	8900 Agilent, USA
RF power	1550 W
Plasma gas flow rate	15.0 L min -1
Auxiliary gas flow rate	0.90 L min -1
Sample gas flow rate	1.01 L min -1
Torch	Fassel type, 1.5 mm i.d.
Nebulizer	MicroMist (Nebulizer Sample Particle Size Tolerance - 40 µm)
Sample cone	Ni
Skimmer cone	Ni
Acquisition mode	Spectrum
No. Scans	50
Calibration	External

## Sheet: Quality control
Table S4. Quality control data including LODs for soil, plant and extract analyses and values for certified reference material.
								Certified values
	LODsoil analysis		LODplant analysis		LODeluate analysis		CRMSLRS-4(avg ± std)	with associated uncertainties
	mg/kg		mg/kg		µg/L		µg/L	µg/L
Al	25	Al	6	Al	0.3	Al	51 ± 1	54 ± 4
As	0.3	As	0.005	As	0.002	As	0.71 ± 0.02	0.68 ± 0.006
Ba	0.3	Ba	0.3	Ba	0.005	Ba	12.0 ± 0.5	12.2 ± 0.6
Ca	30	Ca	5	Ca	0.5	Ca	6150 ± 250	6200 ± 200
Cd	0.03	Cd	0.002	Cd	0.002	Cd	0.014 ± 0.001	0.012 ± 0.002
Co	0.04	Co	0.002	Co	0.002	Co	0.035 ± 0.005	0.033 ± 0.008
Cr	0.4	Cr	0.03	Cr	0.002	Cr	0.32 ± 0.02	0.33 ± 0.02
Cu	0.3	Cu	0.03	Cu	0.01	Cu	1.80 ± 0.05	1.81 ± 0.08
Fe	10	Fe	3	Fe	0.3	Fe	99 ± 5	103 ± 5
Li	0.14	Li	0.005	Li	0.002	Li	0.49 ± 0.04	0.54*
Mg	20	Mg	6	Mg	2	Mg	1500 ± 100	1600 ± 100
Mn	0.45	Mn	0.05	Mn	0.005	Mn	3.35 ± 0.05	3.37 ± 0.18
Mo	0.15	Mo	0.01	Mo	0.002	Mo	0.23 ± 0.02	0.21 ± 0.02
Ni	0.6	Ni	0.03	Ni	0.002	Ni	0.65 ± 0.05	0.67 ± 0.08
P	5	P	10	P	5	P	10	9.13*
Pb	0.45	Pb	0.03	Pb	0.01	Pb	0.090 ± 0.005	0.086 ± 0.007
S	5	S	10	S	5	S	-	-
Sb	0.15	Sb	0.002	Sb	0.002	Sb	0.21 ± 0.01	0.23 ± 0.04
Sc	0.6	Sc	0.002	Sc	0.002	Sc	-	-
Se	0.03	Se	0.002	Se	0.002	Se	0.20 ± 0.02	0.23*
Sn	0.003	Sn	0.003	Sn	0.002	Sn	0.013 ± 0.02	0.015**
Sr	0.6	Sr	0.5	Sr	0.01	Sr	25.6 ± 0.5	26.3 ± 3.2
Ti	0.6	Ti	0.5	Ti	0.05	Ti	1.3 ± 0.1	1.46*
Tl	0.04	Tl	0.002	Tl	0.002	Tl	0.009 ± 0.02	0.0076*
U	0.03	U	0.002	U	0.002	U	0.055 ± 0.002	0.050 ± 0.003
V	0.03	V	0.002	V	0.002	V	0.34 ± 0.02	0.32 ± 0.03
Zn	2	Zn	0.5	Zn	0.05	Zn	0.95 ± 0.05	0.93 ± 0.10
LOD - limits of detection
* Yeghicheyan et al. (2001)
** informative value included in laboratory validation protocol

## Sheet: Health risk assessment
Table S5. The hazard quotients (HQs) calculated for oral intake of various elements in vegetables (Zorić, 2020).
Sampling site	Vegetable type	Part of the plant	As	Cd	Cr	Cu	Fe	Mn	Mo	Ni	Se	Sn	Sr	U	V
K1	parsley	stem	0.2	0.03	0.11	0.1	0.12	0.07	0	0.05	0.07	0.14	0	0	0.04
	parsley	leaf	0.11	0.04	0.03	0.04	0.04	0.02	0	0.02	0	0.09	0.02	0	0.01
	onion	bulb	0.09	0.07	0.04	0	0.05	0.01	0.02	0	0	0.08	0	0	0.02
K2	fennel	leaf	0.14	0.06	0.08	0.12	0.1	0.1	0	0.04	0.03	0.12	0.01	0	0.03
K3	onion	bulb	0.04	0.11	0.07	0.04	0.02	0.02	0	0.02	0.02	0.17	0	0	0
	garlic	bulb	0.07	0.06	0	0.01	0.01	0.01	0.03	0	0.08	0.07	0	0	0
R1	lettuce	leaf	0.12	0.05	0.08	0.07	0.1	0.09	0	0.04	0.05	0.11	0	0	0.03
	lettuce	leaf	0.3	0.06	0.18	0.06	0.18	0.07	0	0.06	0.04	0.17	0	0	0.06
	garlic	bulb	0.04	0.1	0.01	0.04	0.02	0.01	0.03	0	0.3	0.11	0	0	0
R2	lettuce	leaf	0.49	0.07	0.15	0.11	0.17	0.08	0	0.11	0.11	0.14	0	0	0.05
	radicchio	leaf	0.28	0.04	0.12	0.09	0.15	0.07	0	0.07	0.13	0.17	0	0	0.05
O1	parsley	stem	0.27	0.05	0.09	0.03	0.11	0.04	0	0.04	0	0.1	0.02	0	0.04
	parsley	leaf	0.42	0.03	0.17	0.07	0.21	0.09	0	0.04	0	0.15	0	0	0.07
O2	radicchio	leaf	0.37	0.15	0.13	0.09	0.18	0.13	0	0.03	0	0.12	0.01	0	0.06
	fennel	leaf	0.2	0.02	0.08	0.08	0.07	0.1	0	0.01	0	0.12	0	0	0.03
O3	lettuce	leaf	0.3	0.12	0.23	0.1	0.21	0.07	0	0.05	0.02	0.14	0	0	0.07
	onion	bulb	0.14	0.03	0.06	0.05	0.06	0.04	0.01	0.02	0	0.18	0	0	0.03
O4	lettuce	leaf	0.41	0.03	0.2	0.07	0.26	0.07	0	0.05	0	0.13	0	0	0.08
	parsley	stem	0.63	0.1	0.13	0.07	0.19	0.06	0	0.3	0.01	0.13	0	0	0.06
	parsley	leaf	0.27	0.03	0.16	0.04	0.21	0.09	0.02	0.02	0	0.13	0	0	0.06
O5	lettuce	leaf	0.37	0.1	0.16	0.06	0.2	0.07	0.02	0.02	0	0.13	0	0	0.06
	radicchio	leaf	0.67	0.11	0.3	0.04	0.4	0.13	0	0.04	0	0.17	0	0	0.13

## Sheet: Transfer factors
Table S6. Transfer factors of metals and metalloids from soils to vegetables.
Sampling site	Vegetable type	Part of the plant	Al	As	Ba	Ca	Cd	Co	Cr	Cu	Fe	Li	Mg	Mn	Mo	Ni	P	Pb	S	Sb	Sc	Se	Sn	Sr	Ti	Tl	U	V	Zn
K1	parsley	root	0.0369726	0.0374249	0.268787	0.0272792	0.127031	0.033605	0.0307082	0.248138	0.027361	0.0312597	0.245687	0.045203	0.0570586	0.0438237	1.70909	0.0454012	0.242952	0.0328485	0.0381989	0.195631	0.0367759	0.120065	0.0258569	0.0653012	0.0260236	0.0318103	0.158938
	parsley	stem	0.0049114	0.0102735	0.451591	0.0796346	0.127031	0.0115217	0.00438689	0.121257	0.00490713	0.00588054	0.129662	0.0224435	0.0305066	0.023662	4.58328	0.00748371	0.291182	0.0109495	0.00424432	0.242994	0.0152176	0.200851	0.00226457	0.0163253	0.00473156	0.00408261	0.102021
	parsley	leaf	0.0127148	0.0198132	0.120304	0.0539299	0.0988021	0.0230434	0.0154638	0.29942	0.0131972	0.0148561	0.227278	0.0636952	0.109598	0.0562848	5.08214	0.0129718	0.666217	0.021899	0.012733	0.327424	0.0240945	0.0633798	0.0140962	0.0163253	0.00709734	0.0118225	0.277784
	onion	root	0.0954358	0.171714	0.192559	0.06843	1.05859	0.159384	0.151348	2.31596	0.125243	0.166512	0.200459	0.136715	0.497144	0.12153	8.47653	0.154663	1.39687	0.191616	0.148551	0.413913	0.161053	0.18032	0.10593	0.212229	0.141947	0.278128	0.615706
	onion	bulb	0.00336568	0.00880585	0.0401013	0.0442754	0.218776	0.00576085	0.00515459	0.0276261	0.00605957	0.00649954	0.138753	0.0134029	0.239533	0.00784067	1.49412	0.00508892	0.340613	0.0383232	0.00424432	0.179157	0.0139495	0.0870356	0.0035449	0.0163253	0.0141947	0.00518831	0.111686
	onion	leaf	0.0114682	0.0154102	0.0265897	0.0603011	0.254063	0.0211231	0.0119543	0.133498	0.035205	0.0126896	0.253415	0.0559506	0.341787	0.0299625	3.50679	0.010577	1.50074	0.0273737	0.0113182	1.13466	0.0202901	0.0436071	0.0116773	0.0163253	0.00946312	0.0104617	0.361548
K2	fennel	root	0.0607553	0.179355	0.117899	0.126992	0.690314	0.0595921	0.0574736	0.341508	0.0454974	0.0615199	0.429075	0.0748189	0.0933716	0.0940565	0.780615	0.103007	0.633558	0.208965	0.0614386	0.313114	0.0635496	0.318013	0.0502752	0.0852349	0.0915315	0.0572602	0.304859
	fennel	leaf	0.0120386	0.019698	0.015403	0.0709811	0.221254	0.0155856	0.0154844	0.314245	0.0129174	0.0939376	0.308217	0.0270631	0.215922	0.046146	1.37457	0.0215131	2.49044	0.021617	0.0129344	0.318512	0.0317748	0.0866017	0.0135824	0.017047	0.0286036	0.0134241	0.119058
K3	onion	root	0.0538499	0.0851945	0.103641	0.187594	1.54482	0.129169	0.0798685	0.540274	0.0759116	0.0889668	0.214844	0.116591	1.53413	0.0784193	6.15613	0.107152	9.25477	0.0961739	0.0730682	0.124109	0.10806	0.430934	0.0542685	0.113853	0.0853834	0.0872981	0.812561
	onion	bulb	0.000861649	0.00273059	0.00556952	0.0995307	0.373144	0.00496806	0.00620466	0.156879	0.00136075	0.00427041	0.103148	0.0108753	0.170742	0.0128373	4.35952	0.0148528	6.81765	0.016029	0.000702579	0.0906949	0.0417072	0.118638	0.00082529	0.0162647	0.000569223	0.000671524	0.322941
	onion	leaf	0.0112727	0.0158374	0.0133184	0.0555863	0.149258	0.0143522	0.0132014	0.280142	0.0122951	0.0122774	0.21392	0.0442848	0.226806	0.0298607	5.15814	0.0180355	7.22891	0.0240435	0.0119438	0.116949	0.0360199	0.0356785	0.0105465	0.0162647	0.0113845	0.0116957	0.2271
K5	lettuce	root	0.149446	0.13723	0.164231	0.211257	0.390857	0.139889	0.133544	0.363265	0.128136	0.158028	0.303696	0.133581	0.248798	0.114202	1.73307	0.1399	1.44875	0.220494	0.16616	0.168889	0.134094	0.405918	0.100877	0.16712	0.161496	0.154938	0.355474
	lettuce	leaf	0.0156488	0.0215771	0.0310511	0.287196	0.353633	0.020761	0.0168328	0.158196	0.0158188	0.0159592	0.247582	0.0467953	0.360979	0.0435886	2.874	0.0187774	1.88835	0.0187654	0.0158935	0.120995	0.0359763	0.173862	0.0147469	0.0159162	0.0159222	0.0151311	0.251719
	garlic	root	0.0908003	0.113064	0.0829647	0.190978	0.415673	0.0756293	0.0776421	0.148821	0.0645934	0.0858982	0.628245	0.0764519	0.524253	0.065906	1.68242	0.0845831	5.01415	0.0703704	0.0910266	0.322653	0.0768585	0.234929	0.05868	0.0875393	0.100082	0.135765	0.304047
	garlic	bulb	0.000653259	0.00388388	0.00844202	0.0595365	0.155102	0.00247154	0.000621137	0.0213272	0.000898046	0.0042245	0.149763	0.0057633	0.649763	0.00296403	1.35811	0.00186083	2.03286	0.00469136	0.000722433	0.466335	0.0147176	0.0479917	0.000597789	0.00159162	0.000569223	0.0008291	0.131273
	garlic	leaf	0.0093839	0.0125147	0.0144582	0.0813838	0.0868571	0.0108748	0.00975185	0.0903475	0.00922763	0.00938779	0.267424	0.0265481	0.295448	0.024584	2.11143	0.0143791	3.54313	0.0140741	0.00939163	0.925108	0.0277999	0.0295278	0.00810971	0.00795812	0.00909839	0.00948284	0.312618
R1	lettuce	root	0.064291	0.0968893	0.0877952	0.040248	0.486988	0.0420608	0.0457988	0.364731	0.0494624	0.136338	0.265826	0.0576508	0.10984	0.0497708	0.726835	0.0232387	0.273753	0.0781818	0.059558	-	0.0385266	0.088065	0.0436135	0.129	0.063847	0.0710907	0.389248
	lettuce	leaf	0.00928648	0.0137188	0.0247254	0.0662556	0.227952	0.0145595	0.00921396	0.205702	0.0107216	0.0101211	0.421612	0.0463502	0.342003	0.0374074	2.675	0.00545604	0.726173	0.00651515	0.00887033	0.176397	0.0179791	0.0674951	0.00945569	0.0184286	0.00870641	0.00906586	0.295886
	lettuce	root	0.199943	0.186062	0.214679	0.150308	0.611325	0.17795	0.179763	0.347446	0.172404	0.230703	0.377688	0.163329	0.716459	0.153222	1.89471	0.10811	0.787175	0.247576	0.223026	0.266979	0.132275	0.24234	0.140736	0.368571	0.284409	0.256716	0.402175
	lettuce	leaf	0.020248	0.0342971	0.0437425	0.0652301	0.279759	0.0248051	0.0214992	0.178044	0.0203354	0.0202423	0.225397	0.0403467	0.239652	0.0599152	2.52439	0.013438	0.481293	0.0260606	0.020275	0.1319	0.0282529	0.0826011	0.0171522	0.0368571	0.020315	0.0197474	0.266201
	garlic	root	0.125257	0.114895	0.103617	0.0601805	0.445542	0.0798077	0.0921396	0.252373	0.0900974	0.118179	0.598829	0.0678919	1.12087	0.0868612	1.90242	0.0501147	1.84658	0.0977273	0.131788	0.684928	0.0693479	0.113456	0.0740329	0.147429	0.101575	0.164263	0.317431
	garlic	bulb	0.00116266	0.00428714	0.0125333	0.0181152	0.486988	0.00215697	0.00135499	0.125322	0.00175835	0.0062513	0.220533	0.0069746	1.53277	0.00507219	2.34705	0.00222283	2.05999	0.00651515	0.00126719	1.06474	0.0192633	0.0265159	0.000952899	0.00368571	0.00290214	0.00170546	0.294928
	garlic	leaf	0.0157402	0.0257228	0.0180554	0.0252613	0.14506	0.0140203	0.0167116	0.179773	0.0158323	0.0160748	0.341819	0.0291344	0.501771	0.0357167	3.10216	0.00808302	3.05318	0.0195455	0.0164735	2.2725	0.0256844	0.0174202	0.0144767	0.0184286	0.0116085	0.0147208	0.360042
R2	lettuce	root	0.102863	0.128433	0.153205	0.10635	0.535789	0.115509	0.113563	0.326382	0.107723	0.134693	0.286526	0.114289	0.307867	0.0883757	4.1005	0.129312	0.832684	0.262167	0.104932	0.228319	0.275443	0.236717	0.0874771	0.153247	0.165497	0.140083	0.379892
	lettuce	leaf	0.0120981	0.0309012	0.0318839	0.0829916	0.377037	0.0233352	0.0144942	0.392831	0.0140268	0.01317	0.325517	0.045341	0.0805347	0.0891973	5.32896	0.0208732	1.85815	0.0197862	0.0131164	0.324021	0.030967	0.0797208	0.0124618	0.0109462	0.0134707	0.0130381	0.390483
	radicchio	root	0.0163559	0.0202789	0.0459345	0.0536767	0.317505	0.0262521	0.0278677	0.181953	0.0166273	0.0127709	0.264381	0.0309143	0.100923	0.0267501	1.90027	0.0341098	1.09621	0.0643052	0.0172153	0.231053	0.0570445	0.161398	0.0138791	0.0328387	0.0519584	0.0343235	0.337989
	radicchio	leaf	0.011041	0.0178647	0.0310733	0.08609	0.188519	0.019835	0.0120287	0.300975	0.0117678	0.0125714	0.356357	0.0423433	0.115195	0.0564217	3.46493	0.0218914	2.20105	0.0148397	0.0122967	0.378708	0.0374864	0.0943933	0.0173977	0.0218925	0.0153951	0.0119465	0.347659
O1	parsley	root	0.0586006	0.0774332	0.316326	0.0857172	0.454456	0.0685995	0.0695504	0.277106	0.0685811	0.0917046	0.63966	0.0927197	0.759545	0.0656938	1.19822	0.0854238	3.79498	0.0694081	0.0886136	-	0.0497939	0.253762	0.0614395	0.093072	0.0836077	0.0794597	0.264493
	parsley	stem	0.0104107	0.0169975	0.470602	0.267919	0.233054	0.0141442	0.0106722	0.086066	0.010072	0.00957009	0.431334	0.0267441	0.227864	0.0367533	0.868527	0.0167633	2.22974	0.017352	0.0116853	0.887971	0.0179811	0.383131	0.00979382	0.0143188	0.0115321	0.0102162	0.180313
	parsley	leaf	0.0191289	0.0259685	0.138316	0.170037	0.163138	0.0212164	0.0200783	0.190714	0.0187666	0.0193505	0.55018	0.0607725	0.703845	0.0367533	2.05684	0.0225041	5.76979	0.023136	0.0185017	1.29159	0.0276633	0.132686	0.0169415	0.0214781	0.0201812	0.0182883	0.319574
O2	radicchio	root	0.0433008	0.0524091	0.12563	0.0740338	0.582636	0.0572842	0.0475728	0.384689	0.04178	0.0536345	0.209362	0.0718032	0.243055	0.05502	0.765052	0.0592455	2.12437	0.0694081	0.0603741	0.322899	0.0456444	0.247957	0.0398444	0.0572751	0.0720756	0.0535407	0.389205
	radicchio	leaf	0.0160861	0.0231355	0.0679303	0.196398	0.757427	0.0226308	0.0150135	0.252656	0.0160692	0.0160904	0.509413	0.0835622	0.470918	0.030261	2.59402	0.021356	6.91016	0.017352	0.0165542	0.968696	0.0221306	0.229713	0.0060527	0.0214781	0.0144151	0.0151982	0.35439
	fennel	root	0.0634042	0.0590192	0.218114	0.191138	0.594289	0.106789	0.0776902	0.366758	0.0678638	0.0599445	0.828639	0.107184	0.2785	0.116642	1.86199	0.129743	2.77188	0.0983281	0.0720594	5.48928	0.0746908	0.580502	0.066306	0.0859126	0.0836077	0.0693696	0.550811
	fennel	leaf	0.00753875	0.012276	0.0286044	0.230802	0.081569	0.00990096	0.00931559	0.233095	0.00657116	0.00641511	0.541025	0.0662878	0.415218	0.0139751	1.9429	0.0204374	7.94515	0.023136	0.00779021	1.69522	0.0221306	0.156736	0.00775598	0.0143188	0.00864907	0.00674777	0.319574
O3	lettuce	root	0.207504	0.265152	0.290203	0.231006	0.518102	0.256295	0.228418	0.493359	0.230935	0.301877	0.451456	0.230302	0.778861	0.203602	1.79116	0.275217	10.3701	0.271091	0.243171	0.231792	0.433355	3.71248	0.152856	0.302267	0.255185	0.286615	0.438115
	lettuce	leaf	0.0124548	0.0152386	0.0333479	0.116365	0.414482	0.0164761	0.0201624	0.20655	0.0137604	0.0133743	0.296711	0.0382656	0.28443	0.0410856	3.98298	0.0170609	8.79901	0.0190909	0.0133611	0.180283	0.0263902	0.0644712	0.0127285	0.0143937	0.0144444	0.012654	0.245949
	onion	root	0.0789944	0.172958	0.135683	0.167431	0.924613	0.108468	0.109855	0.335201	0.0904465	0.113873	0.259449	0.0852119	0.946329	0.110475	2.7074	0.104483	9.07333	0.0954545	0.0921914	0.0772642	0.112506	0.275121	0.0698443	0.105554	0.113951	0.220439	0.435093
	onion	bulb	0.00436678	0.00723835	0.0659322	0.20795	0.111591	0.00961106	0.00488989	0.105163	0.00423067	0.00473832	0.263144	0.022233	0.63	0.0121431	2.44634	0.00933993	9.48689	0.0114545	0.00400832	-	0.033335	0.295838	0.0036258	0.00959578	0.00641975	0.00496323	0.117234
	onion	leaf	0.0102778	0.0175244	0.0776422	0.447081	0.111591	0.0160184	0.0125931	0.0871051	0.0107903	0.010623	0.215104	0.0316223	1.37165	0.0258383	2.67565	0.0130759	10.9478	0.0114545	0.0100208	0.103019	0.0291682	0.356332	0.00891182	0.0143937	0.0112346	0.0114467	0.104845
O4	lettuce	root	0.233376	0.249197	0.153529	0.763548	0.534714	0.282601	0.240232	0.406288	0.224911	0.279674	0.436302	0.257913	0.473593	0.206692	0.924129	0.258479	5.35977	0.238717	0.240909	0.167066	0.211527	0.553957	0.175711	0.270572	0.263919	0.26734	0.45563
	lettuce	leaf	0.016059	0.0217042	0.031411	0.369026	0.112117	0.0220079	0.0177999	0.151339	0.016335	0.016871	0.285495	0.030417	0.156591	0.0369692	2.59205	0.0218021	5.5551	0.019893	0.0163969	0.0525064	0.0332959	0.137959	0.0149752	0.0177424	0.0188514	0.0164361	0.208042
	parsley	root	0.0400247	0.0490355	0.281417	0.262766	0.275981	0.0470169	0.0484478	0.13737	0.0444825	0.0566141	0.255906	0.0457656	0.295996	0.068309	1.22425	0.0501225	2.78254	0.0447594	0.0485601	0.109786	0.070509	0.318366	0.0385518	0.0532273	0.049699	0.0527578	0.296589
	parsley	stem	0.0117899	0.0333602	0.287186	0.848933	0.215611	0.0305109	0.011309	0.150175	0.0121429	0.00939794	0.152398	0.0268426	0.122218	0.224336	1.10581	0.0458519	2.56527	0.019893	0.0119824	0.128879	0.0332959	0.492406	0.00552124	0.00887122	0.0137101	0.0120227	0.307335
	parsley	leaf	0.0118016	0.0140676	0.0580142	0.58736	0.103493	0.0120043	0.0139187	0.0838187	0.0130722	0.0130212	0.211364	0.0400186	0.706571	0.0141155	2.16094	0.0137106	6.40023	0.0149198	0.0119824	0.0477331	0.0332959	0.160244	0.0108875	0.0133068	0.0119963	0.0122763	0.135829
O5	lettuce	root	0.073344	0.106204	0.185216	0.658898	0.86519	0.129018	0.128427	0.259452	0.111285	0.138583	0.133443	0.12972	0.49058	0.125582	2.11418	0.155759	3.53407	0.145355	0.116595	0.182232	0.12649	0.36099	0.0882001	0.182923	0.144283	0.124335	0.367637
	lettuce	leaf	0.00978061	0.0137308	0.0380494	1.18041	0.404983	0.0122531	0.011971	0.153185	0.0110345	0.0103442	0.302789	0.0304624	0.235008	0.0159898	4.1624	0.0146538	8.32026	0.016612	0.00957544	0.0999337	0.0252979	0.20173	0.00948663	0.0152436	0.0117439	0.0101408	0.203391
	radicchio	root	0.0698357	0.0809839	0.115721	0.526311	0.37737	0.0857716	0.0755451	0.195754	0.0692458	0.089089	0.243481	0.0765204	0.437703	0.0654194	1.91738	0.0841361	3.43529	0.120437	0.0856157	0.135204	0.0818462	0.277231	0.0543558	0.106705	0.0822075	0.0850946	0.184424
	radicchio	leaf	0.0228462	0.0243792	0.0632061	1.82009	0.451003	0.023425	0.0231865	0.121492	0.0224488	0.0256378	0.248628	0.0585199	1.2808	0.0267957	1.61716	0.02585	6.95207	0.029071	0.0219672	0.0999337	0.0327385	0.313802	0.0198279	0.0304871	0.0251656	0.0232798	0.152947
